# Supplementary material for: Theoretical study of the mechanism of the solvent dependency of ESIPT in HBT
Source: Royal Society of Chemistry journal article supplement (doi:10.1039/d0cp06604d), 2021-01-01
Supplement: d0cp06604d1.pdf [file d0cp06604d1.pdf]

Supplementary information for  
“Theoretical study of the mechanism  
of the solvent dependency of ESIPT in HBT”

Keiji Naka,<sup>a</sup> Hirofumi Sato,<sup>a,b,c</sup> and Masahiro Higashi<sup>\*a,b</sup>

<sup>a</sup> Department of Molecular Engineering, Graduate School of Engineering,  
Kyoto University, Kyoto 615-8510, Japan.

<sup>b</sup> Elements Strategy Initiative for Catalysts and Batteries (ESICB), Kyoto University,  
Kyoto 615-8520, Japan.

<sup>c</sup> Fukui Institute for Fundamental Chemistry, Kyoto University, Kyoto 606-8103, Japan.

E-mail: [higashi@moleng.kyoto-u.ac.jp](mailto:higashi@moleng.kyoto-u.ac.jp)

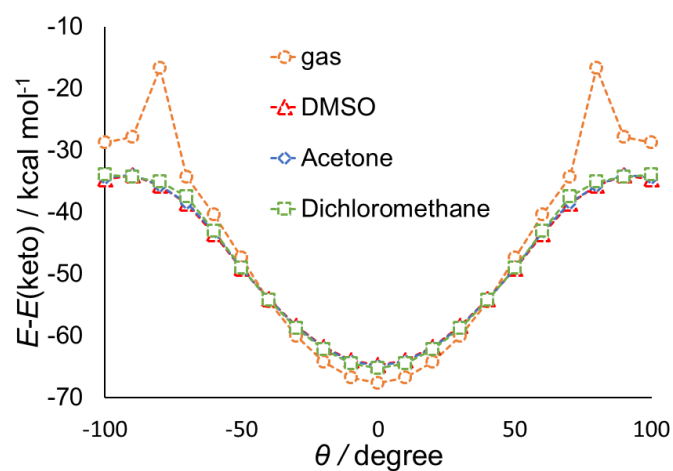

Figure S1. Calculated  $S_0$  energy profiles along C=C twisting at the  $\omega$ B97X-D/6-31G(d,p) level.

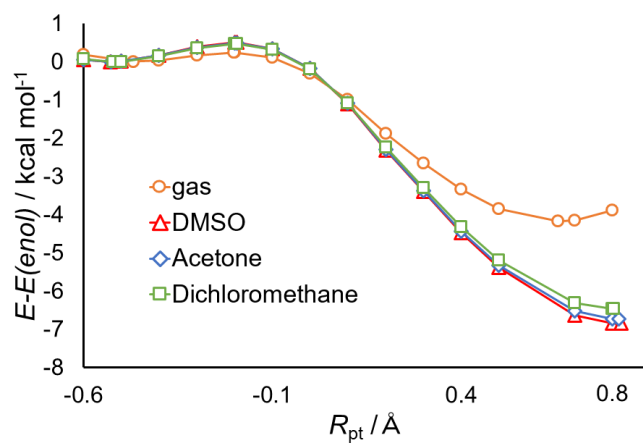

Figure S2. Calculated  $S_1$  energy profiles along ES IPT in the gas phase and in solutions at the M11/6-31G(d,p) level.

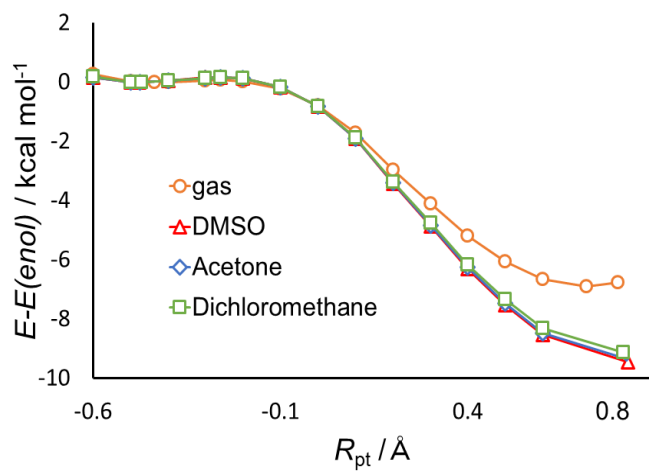

Figure S3. Calculated  $S_1$  energy profiles along ES IPT in the gas phase and in solutions at the EOM-CCSD/6-31G(d,p) level.

Table S1. Calculated activation energies of ESIPT  $\Delta E_{pt}$  (in kcal/mol).

| Calculation level        | gas  | DMSO | Acetone | CH <sub>2</sub> Cl <sub>2</sub> |
|--------------------------|------|------|---------|---------------------------------|
| $\omega$ B97X-D/6-31G(d) | 0.53 | 1.16 | 1.18    | 1.13                            |
| M11/6-31G(d,p)           | 0.24 | 0.51 | 0.50    | 0.47                            |
| EOM-CCSD/6-31G(d,p)      | 0.08 | 0.17 | 0.17    | 0.16                            |

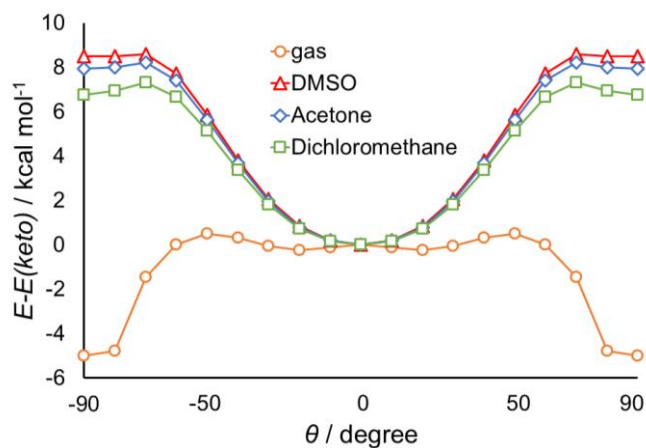

Figure S4. Calculated  $S_1$  energy profiles along C=C twisting at the M11/6-31G(d,p) level.

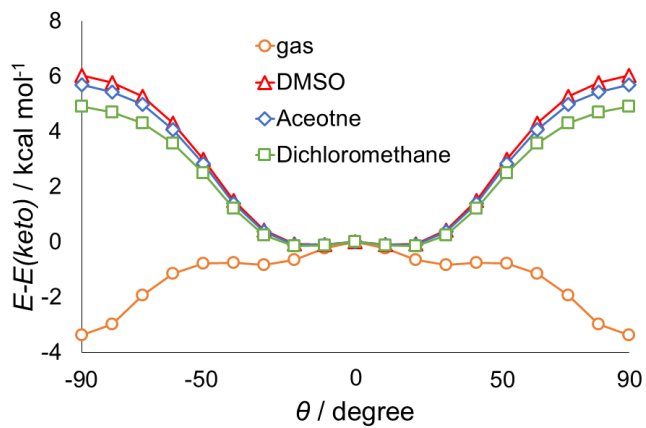

Figure S5. Calculated  $S_2$  energy profiles along C=C twisting at the EOM-CCSD/6-31G(d,p) level.

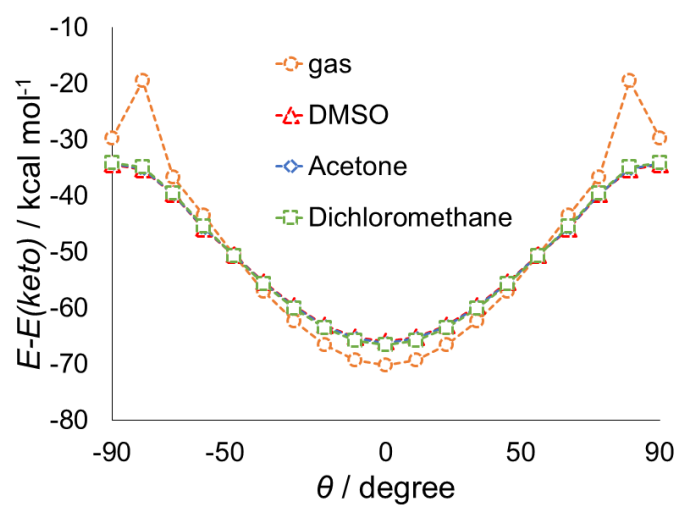

Figure S6. Calculated  $S_0$  energy profiles along C=C twisting at the M11/6-31G(d,p) level.

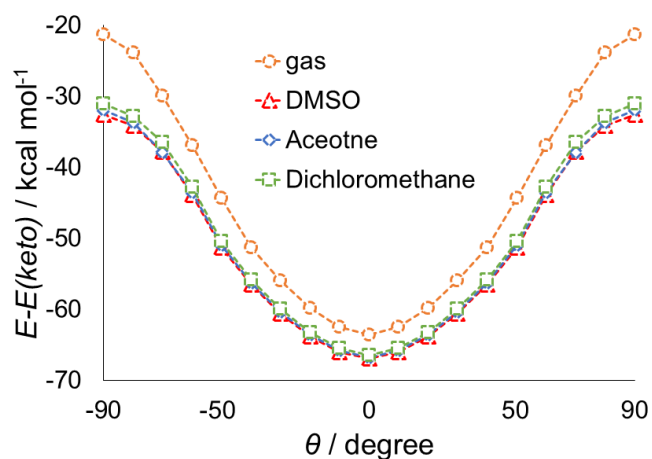

Figure S7. Calculated  $S_0$  energy profiles along C=C twisting at the EOM-CCSD/6-31G(d,p) level.

Table S2. Calculated activation energies of C=C twisting  $\Delta E_{tw}$  (in kcal/mol).

| Calculation level        | gas        | DMSO | Acetone | CH <sub>2</sub> Cl <sub>2</sub> |
|--------------------------|------------|------|---------|---------------------------------|
| $\omega$ B97X-D/6-31G(d) | No barrier | 4.56 | 4.21    | 3.45                            |
| M11/6-31G(d,p)           | 0.50       | 8.59 | 8.20    | 7.31                            |
| EOM-CCSD/6-31G(d,p)      | No barrier | 6.04 | 5.70    | 4.90                            |

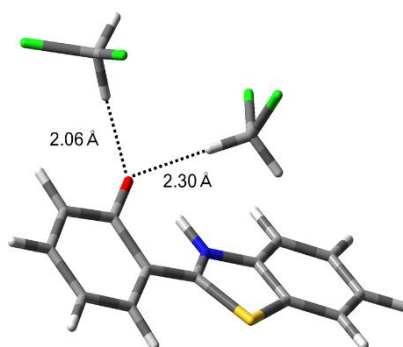

Figure S8. Optimized geometry of complex between the keto HBT and two  $\text{CH}_2\text{Cl}_2$  molecules at the PCM- $\omega\text{B97X-D/6-31G(d,p)}$  level.

Table S3. Calculated interaction energies  $E_{\text{int}}$  between the keto HBT and one or two  $\text{CH}_2\text{Cl}_2$  molecules in the  $S_1$  state and  $S_1 \rightarrow S_0$  transition energies  $\Delta E_{1 \rightarrow 0}$  of the complexes (in kcal/mol).

| Calculation level                      | one $\text{CH}_2\text{Cl}_2$ |                              | two $\text{CH}_2\text{Cl}_2$ |                              |
|----------------------------------------|------------------------------|------------------------------|------------------------------|------------------------------|
|                                        | $E_{\text{int}}$             | $\Delta E_{1 \rightarrow 0}$ | $E_{\text{int}}$             | $\Delta E_{1 \rightarrow 0}$ |
| $\omega\text{B97X-D/6-31G(d,p)}$       | -18.35                       | 22.32                        | -27.43                       | 20.66                        |
| $\omega\text{B97X-D/6-311G(d,p)}$      | -17.56                       | 24.71                        | -29.03                       | 23.58                        |
| PCM- $\omega\text{B97X-D/6-31G(d,p)}$  | -7.04                        | 63.75                        | -7.46                        | 62.74                        |
| PCM- $\omega\text{B97X-D/6-311G(d,p)}$ | -7.46                        | 63.73                        | -12.34                       | 63.03                        |
